# Supplementary material for: Identifying barriers to evidence-based care for sickle cell disease: results from the Sickle Cell Disease Implementation Consortium cross-sectional survey of healthcare providers in the USA
Source: HighWire-hosted journal article supplement (doi:10.1136/bmjopen-2021-050880), 2021-11-01
Supplement: bmjopen-2021-050880supp002_data_supplement.pdf [file bmjopen-2021-050880supp002_data_supplement.pdf]

**Supplemental Material****Supplemental Table 1. Barriers to prescribing opioids for SCD chronic pain (N=105)**

|                                 | <b>Not a barrier<br/>n(%)</b> | <b>Minimal barrier<br/>n(%)</b> | <b>Somewhat a barrier<br/>n(%)</b> | <b>Moderate barrier<br/>n(%)</b> | <b>Complete barrier<br/>n(%)</b> | <b>Missing<br/>n</b> |
|---------------------------------|-------------------------------|---------------------------------|------------------------------------|----------------------------------|----------------------------------|----------------------|
| Dependence                      | 1 (1.2)                       | 10 (11.9)                       | 20 (23.8)                          | 40 (47.6)                        | 13 (15.5)                        | 21                   |
| Tolerance                       | 2 (2.4)                       | 11 (13.3)                       | 20 (24.1)                          | 52 (50.6)                        | 8 (9.6)                          | 22                   |
| Addiction                       | 3 (3.6)                       | 13 (15.7)                       | 22 (26.5)                          | 28 (33.7)                        | 17 (20.5)                        | 22                   |
| Community perception            | 18 (21.7)                     | 21 (25.3)                       | 17 (20.5)                          | 18 (21.7)                        | 9 (10.8)                         | 22                   |
| Regulatory                      | 9 (11.1)                      | 26 (32.1)                       | 22 (27.2)                          | 18 (22.2)                        | 6 (7.4)                          | 24                   |
| Lack of Efficacy                | 20 (24.4)                     | 22 (26.8)                       | 19 (23.2)                          | 20 (24.4)                        | 1 (1.2)                          | 23                   |
| Time-commitment to prescribing* | 19 (23.2)                     | 27 (32.9)                       | 18 (22.0)                          | 16 (19.5)                        | 2 (2.4)                          | 23                   |
| Cognitive effects               | 10 (12.0)                     | 26 (31.3)                       | 31 (37.3)                          | 16 (19.3)                        | 0 (0)                            | 22                   |
| Training in prescribing opioids | 28 (33.7)                     | 26 (31.3)                       | 15 (18.1)                          | 10 (12.0)                        | 4 (4.8)                          | 22                   |
| Provider restrictions           | 17 (21.3)                     | 26 (32.5)                       | 23 (28.8)                          | 11 (13.8)                        | 3 (3.8)                          | 25                   |
| Diversion                       | 22 (26.8)                     | 23 (28.0)                       | 23 (28.0)                          | 12 (14.6)                        | 2 (2.4)                          | 23                   |
| Psychomotor effects             | 14 (17.1)                     | 29 (35.4)                       | 26 (31.7)                          | 12 (14.6)                        | 1 (1.2)                          | 23                   |
| Respiratory effects             | 17 (20.5)                     | 27 (32.5)                       | 28 (33.7)                          | 10 (12.0)                        | 1 (1.2)                          | 22                   |
| Cost                            | 25 (32.9)                     | 31 (40.8)                       | 13 (17.1)                          | 7 (9.2)                          | 0 (0)                            | 29                   |
| Overview                        | 5 (50.0)                      | 3 (30.0)                        | 1 (10.0)                           | 0 (0)                            | 1 (10.0)                         | 95                   |
| Availability                    | 33 (40.2)                     | 35 (42.7)                       | 13 (15.9)                          | 1 (1.2)                          | 0 (0)                            | 23                   |

\*prior authorization, dose adjustments and/or state database assessment \*\*missing values not included in the denominator for percentages

**Supplemental Table 2**

| <b>19. Which of the following CRITERIA do you use to place patients with sickle cell disease on hydroxyurea therapy? (check all that apply) (variable name)</b> |     |        |
|-----------------------------------------------------------------------------------------------------------------------------------------------------------------|-----|--------|
| Episodes of acute chest syndrome (ps_q14___1)                                                                                                                   | 45  | 42. 9% |
| At least three painful episodes/year requiring hospitalization (ps_q14___2)                                                                                     | 44  | 41. 9% |
| At least three painful episodes/year at home (ps_q14___3)                                                                                                       | 33  | 31. 4% |
| Chronic pain requiring excessive or frequent opioid use (ps_q14___4)                                                                                            | 37  | 35. 2% |
| Stroke history (ps_q14___5)                                                                                                                                     | 33  | 31. 4% |
| Renal failure (ps_q14___6)                                                                                                                                      | 15  | 14. 3% |
| Priapism (ps_q14___7)                                                                                                                                           | 18  | 17. 1% |
| Low hemoglobin F levels (ps_q14___8)                                                                                                                            | 22  | 21. 0% |
| Pulmonary hypertension (ps_q14___9)                                                                                                                             | 16  | 15. 2% |
| Symptomatic severe anemia (ps_q14___10)                                                                                                                         | 30  | 28. 6% |
| Elevated white cell count without evidence of infection (ps_q14___11)                                                                                           | 16  | 15. 2% |
| Leg ulcers (ps_q14___12)                                                                                                                                        | 11  | 10. 5% |
| Patient or family request (ps_q14___13)                                                                                                                         | 23  | 21. 9% |
| Presence of hypoxemia (ps_q14___14)                                                                                                                             | 11  | 10. 5% |
| Other (ps_q14___15)                                                                                                                                             | 14  | 13. 3% |
| Prefer not to respond (ps_q14___999)                                                                                                                            | 14  | 13. 3% |
| Total number of responses                                                                                                                                       | 105 |        |

**Supplemental Table 3. Factors that influence the prescribing of hydroxyurea (N=105)**

|                                                                    | Don't know/Prefer not to respond<br>n(%) | Not important<br>n(%) | Somewhat important<br>n(%) | Important<br>n(%) | Very important<br>n(%) | Missing<br>n |
|--------------------------------------------------------------------|------------------------------------------|-----------------------|----------------------------|-------------------|------------------------|--------------|
| Patient anticipation of side effects                               | 1 (1.7)                                  | 6 (10.3)              | 19 (32.8)                  | 22 (37.9)         | 10 (17.2)              | 47           |
| Concerns for hydroxyurea causing infertility in male patients      | 2 (3.6)                                  | 15 (27.3)             | 11 (20.0)                  | 16 (29.1)         | 11 (20.0)              | 50           |
| Patient/family adherence with hydroxyurea                          | 1 (1.8)                                  | 9 (15.8)              | 19 (31.6)                  | 18 (31.6)         | 10 (17.5)              | 48           |
| Provider lacks time/resources to adequately explain risks/benefits | 2 (3.8)                                  | 16 (30.8)             | 9 (17.3)                   | 13 (25.0)         | 12 (23.1)              | 53           |
| There is a lack of formal guidelines for use in children           | 2 (4.3)                                  | 16 (34.8)             | 6 (13.0)                   | 6 (13.0)          | 16 (34.8)              | 59           |
| Hydroxyurea is not FDA approved for use in children*               | 2 (4.3)                                  | 18 (39.1)             | 5 (10.9)                   | 5 (10.9)          | 16 (34.8)              | 59           |
| Age of patient (patient is too young)                              | 1 (2.1)                                  | 18 (37.5)             | 9 (18.8)                   | 9 (18.8)          | 11 (22.9)              | 57           |
| My discomfort with carcinogenesis potential                        | 1 (1.8)                                  | 22 (39.3)             | 9 (16.1)                   | 8 (14.3)          | 16 (28.6)              | 49           |
| Patient/family adherence with required blood tests                 | 1 (1.7)                                  | 8 (13.8)              | 23 (39.7)                  | 18 (31.0)         | 8 (13.8)               | 47           |
| Doubt the effectiveness of the drug                                | 2 (3.7)                                  | 25 (46.3)             | 5 (9.3)                    | 5 (9.3)           | 17 (31.5)              | 51           |
| Patients' lack of contraception/possible pregnancy                 | 2 (3.6)                                  | 12 (21.4)             | 21 (37.5)                  | 15 (26.8)         | 6 (10.7)               | 49           |
| Cost Issues                                                        | 1 (2.1)                                  | 23 (47.9)             | 7 (14.6)                   | 5 (10.4)          | 12 (25.0)              | 57           |

\*At the time of survey administration, hydroxyurea had not yet been FDA-approved in children

**Supplemental Table 4. Provider Resources and Perceptions; Aspects of managing SCD patients that providers might find a clinical support tool to be useful (N=105)**

| <b>Number of SCD patients cared for in past year:</b> | <b>Frequency n(%)</b> |
|-------------------------------------------------------|-----------------------|
| None                                                  | 9 (9.0)               |
| 1                                                     | 5 (5.0)               |
| 2 to 3                                                | 11 (11.0)             |
| 4 to 9                                                | 21 (21.0)             |
| 10 to 30                                              | 20 (20.0)             |
| 31 to 100                                             | 15 (15.0)             |
| >100                                                  | 19 (18.0)             |
| Don't know/Prefer not to respond                      | 0 (0)                 |
| Missing                                               | 5                     |
| <b>Number of patients currently under care</b>        |                       |
| None                                                  | 13 (13.4)             |
| 1                                                     | 3 (3.1)               |
| 2 to 3                                                | 10 (10.3)             |
| 4 to 9                                                | 16 (16.5)             |
| 10 to 30                                              | 17 (17.5)             |
| 31 to 100                                             | 17 (17.5)             |
| >100                                                  | 16 (16.5)             |
| Don't know/Prefer not to respond                      | 5 (5.2)               |
| Missing                                               | 8                     |
| <b>SCD care resources used (check all that apply)</b> |                       |
| What I learned in residency                           | 56 (53.3)             |
| What I learned from CME                               | 44 (41.9)             |
| Textbook                                              | 32 (30.5)             |
| Internet                                              | 63 (60.0)             |
| Colleague                                             | 60 (57.1)             |
| Specialist                                            | 75 (71.4)             |
| NHLBI Management Guide                                | 39 (37.1)             |
| Other                                                 | 8 (7.6)               |
| Don't know/Prefer not to respond                      | 0 (0)                 |
| <b>Feel that medical needs of patients are met</b>    |                       |
| Yes                                                   | 60 (63.2)             |
| No                                                    | 23 (24.2)             |
| Don't know/Prefer not to respond                      | 12 (12.6)             |
| Missing                                               | 10                    |
| <b>Feel that mental and behavioral needs are met</b>  |                       |
| Yes                                                   | 21 (21.6)             |
| No                                                    | 59 (60.8)             |
| Don't know/Prefer not to respond                      | 17 (17.5)             |

|                                          |         |           |
|------------------------------------------|---------|-----------|
|                                          | Missing | 8         |
| <b>Aware of NHLBI guidelines for SCD</b> |         |           |
|                                          | Yes     | 52 (66.7) |
|                                          | No      | 26 (33.3) |
|                                          | Missing | 27        |

**Supplemental Table 5. Areas for which a clinical decision support tool for SCD would be “useful” or “very useful”**

|                                  | Frequency n(%) |
|----------------------------------|----------------|
| <b>Diagnosis</b>                 |                |
| Not useful at all                | 16 (26.7)      |
| Somewhat useful                  | 13 (21.7)      |
| Useful                           | 16 (26.7)      |
| Very useful                      | 14 (23.3)      |
| Don't know/Prefer not to respond | 1 (1.7)        |
| Missing                          | 45             |
| <b>Treatments</b>                |                |
| Not useful at all                | 7 (10.8)       |
| Somewhat useful                  | 9 (13.8)       |
| Useful                           | 19 (29.2)      |
| Very useful                      | 29 (44.6)      |
| Don't know/Prefer not to respond | 1 (1.5)        |
| Missing                          | 40             |
| <b>Preventing Complications</b>  |                |
| Not useful at all                | 7 (11.1)       |
| Somewhat useful                  | 8 (12.7)       |
| Useful                           | 22 (34.9)      |
| Very useful                      | 25 (39.7)      |
| Don't know/Prefer not to respond | 1 (1.6)        |
| Missing                          | 42             |

**Note:** SCD denotes sickle cell disease
